# Supplementary material for: Identification and functional characterisation of a rare MTTP variant underlying hereditary non-alcoholic fatty liver disease
Source: bioRxiv or medRxiv preprint supplement (doi:10.1101/2021.07.22.21260356), 2021-07-25
Supplement: Supplementary file [file media-2.pdf]

# Identification and functional characterisation of a rare *MTTP* variant underlying hereditary non-alcoholic fatty liver disease.

Grove, J.I. et al.

Supporting Information

Supplemental Methods

## Table of Primers Used:

| Variant                 | Primer Pair                                                                                       |
|-------------------------|---------------------------------------------------------------------------------------------------|
| rs745447480             | <i>MTTP</i> -F1: 5'- TCTTAACGGCCTCAGCCTAG<br><i>MTTP</i> -R1: 5'- CAGAGTTACCAGTCATGGACTC          |
| rs1800591               | <i>MTTP</i> -F2: 5'- GGCTTGCTAGTGTGCTAATGACAG<br><i>MTTP</i> -R2: 5'- GAGTGACCCTCTTCAGAACCTGC     |
| rs2306986 and rs3816873 | <i>MTTP</i> -F5: 5'- AAGGTAGAATAGGGCAGGGGTCC<br><i>MTTP</i> -R5: 5'- CTAATCTCAGTTGGATCATTTCAGTCTC |
| rs3792683               | <i>MTTP</i> -F6: 5'- GTTACAGGTAGAGAACATGCTGACATG<br><i>MTTP</i> -R6: 5'- CCTCCATGGTACAGTGGTGCAC   |
| rs2306985               | <i>MTTP</i> -F7: 5'- CAGTCACAGAGTCCTACCCAGG<br><i>MTTP</i> -R7: 5'- GAGACTGCTGTCATCACA ACTCTGTG   |
| rs738409                | PNPLA3-6R: 5'- CAGCTGTGGCTACTCTGTCTG<br>PNPLA3-4F: 5'-TGGAGAAAGCTTATGAAGGATCAG                    |
| rs1260326               | GCKR-2F: 5'- GGGTCTTAGGGTACCTGCTCAGAGG<br>GCKR-2R: 5'- GGTAACCCATGACCTTGCCCAGC                    |
| rs58542926              | TM6SF2-2F: 5'- CCAAATGTTGGGATTACAGG<br>TM6SF2-2R: 5'- ACAGATGTCCAGCAGGGTTC                        |

**Genotyping:** For analysis of *MTTP* alleles in family members, the sequence of PCR products generated using the primers listed was determined using Sanger sequencing. PCR-RFLP genotyping of Indian cohort for rs745447480 used primers *MTTP*-F1 and *MTTP*-R1 followed by restriction digestion with Hpy166II. PCR-RFLP was used for genotyping rs738409 (FokI), rs58542926 (MspI) and rs58542926 (Hpy188I).

**Table of Antibodies Used:**

| Antibody                                   | Source                   |
|--------------------------------------------|--------------------------|
| MTTP                                       | Abcam                    |
| OCT3/4                                     | Santa Cruz Biotechnology |
| NANOG                                      | R&D Systems              |
| MESP1                                      | Abcam                    |
| GATA-4                                     | R&D Systems              |
| Nestin                                     | Merck                    |
| SOX2                                       | Novus Biologicals        |
| ALB                                        | R&D Systems              |
| CYP2A6                                     | OriGene Technologies     |
| A1AT                                       | Abcam                    |
| GST-pi                                     | Enzo Life Sciences       |
| Donkey Anti-Mouse AF 488 (1/400 dilution)  | Invitrogen               |
| Donkey Anti-Rabbit AF 647 (1/400 dilution) | Invitrogen               |
| Donkey Anti-Goat AF 647 (1/400 dilution)   | Invitrogen               |

**Microscopy:** Cells were fixed in 4% paraformaldehyde (PFA; VMR) for 20 min at 4°C. Fixed cells were stained with 0.5 µg/ml DAPI (Sigma), 5 µg/ml Hoechst 33342 (Invitrogen) in 1% FBS-PBST for 5 min to counter-stain nuclei, or 30µM Nile Red in methanol (Invitrogen) for 15min in the dark or Oil-Red-O. For immunocytochemistry, blocking and membrane permeabilization of fixed cells was done using 10% foetal bovine serum (FBS; Gibco) and 0.1% TritonX-100 (Thermo Scientific) in PBS (Gibco) for 30min. Cells were incubated overnight at 4°C in a combination of primary antibodies diluted in 1% FBS-PBST solution. The next day, cells were incubated with fluorescent-labelled secondary antibodies for 1h at ambient temperature, followed by nuclei-counterstaining using 0.5 µg/ml DAPI (Sigma) in 1% FBS-PBST for 5min. Images were acquired using the Operetta high content image analyser and analysed with Columbus system (both PerkinElmer).

## Supplemental Tables

**Supplemental Table 1.** Clinical characteristics of other individuals investigated.

| MTTP genotype:<br>MTP residue 564<br>(variant=T) | Sex | Liver Disease<br>Diagnosis<br>(method) | T2D | BMI | Hypertension | Liver biochemistry (LFTs) & lipid blood analyses<br>at diagnosis |
|--------------------------------------------------|-----|----------------------------------------|-----|-----|--------------|------------------------------------------------------------------|
| IT                                               | M   | NASH (USS)                             | x   | <25 | x            | Elevated ALT, Elevated lipids<br>TE<7.9kPa CAP>302               |
| IT                                               | M   | FL (USS)                               | x   | <25 | x            | Normal LFTs, Normal Lipids;                                      |
| IT                                               | M   | FL (USS)                               | x   | <30 | x            | Elevated ALT, Elevated lipids<br>TE<7.9kPa CAP>302               |
| IT                                               | F   | healthy (USS)                          | x   | <25 | x            | Normal LFTs, Normal Lipids<br>TE<7.9kPa CAP<302                  |
| IT                                               | M   | healthy (TE)                           | x   | <30 | x            | Normal Lipids; TE<7.9kPa                                         |
| IT                                               | M   | healthy (USS)                          | x   | <25 | x            | Normal LFTs, Normal lipids,                                      |
| IT                                               | F   | healthy (USS)                          | x   | <25 | x            | Normal LFTs, Normal lipids,<br>TE<7.9kPa CAP<302                 |
| IT                                               | F   | healthy (USS)                          | x   | <25 | x            | Normal LFTs, Normal Lipids;                                      |
| IT <sup>2</sup>                                  | F   | healthy (USS)                          | x   | <25 | x            | Normal LFTs, Normal lipids,<br>TE<7.9kPa CAP<302                 |
| IT <sup>2</sup>                                  | M   | healthy (USS)                          | x   | <30 | x            | Normal LFTs, Normal lipids,<br>TE<7.9kPa CAP<302                 |
| IT                                               | M   | healthy (USS)                          | x   | <30 | x            | Normal LFTs (ALT=14), Normal lipids,<br>TE<7.9kPa CAP<302        |
| IT                                               | F   | FL (USS)                               | x   | <25 | x            | Normal LFTs, Elevated lipids, TE<7.9kPa CAP>302                  |
|                                                  |     | healthy (USS)                          |     |     |              | Recovered. TE<7.9kPa CAP<302                                     |
| IT                                               | M   | FL (USS)                               | x   | <30 | x            | Normal LFTs, Normal Lipids                                       |
|                                                  |     | healthy (USS)                          |     |     |              | Recovered.<br>TE<7.9kPa CAP<302                                  |
| II <sup>3</sup>                                  | M   | FL (USS)                               | x   | <25 | x            | Normal LFTs, Normal Lipids                                       |
|                                                  |     | healthy (USS)                          |     |     |              | Recovered. TE<7.9kPa CAP<302                                     |
| II <sup>3</sup>                                  | F   | healthy (USS)                          | x   | <25 | x            | Normal LFTs, Normal lipids,<br>TE<7.9kPa CAP<302                 |
| II <sup>3</sup>                                  | F   | healthy (USS)                          | x   | <30 | x            | Normal LFTs, Normal Lipids                                       |

<sup>1</sup>MTTP I564T novel variant (mutant allele nucleotide C results in threonine residue 564 (T)); <sup>2</sup> likely heterozygote as parent was MTP564-TT. F: female; M: male; USS: abdominal ultrasonographic steatosis score; NASH: non-alcoholic steatohepatitis; FL: fatty liver; T2D: Type 2 diabetes mellitus; LFTs: liver function tests; ALT: alanine transaminase U/L; TE: transient elastography; CAP: Controlled Attenuation Parameter dB/m. Further clinical details are available upon request to the corresponding author.

**Supplemental Table 2. *MTTP* genotyping**

| Family member | MTTP p.I564T<br>rs745447480<br>(T>C) | PNPLA3<br>p.I148M<br>rs738409<br>(C>G) | TM6SF2<br>p.E167K<br>rs58542926<br>(C>T) | MTTP -493<br>rs1800592<br>(G>T) | MTTP p.I128T<br>rs3816873<br>(T>C) | MTTP Q297H<br>rs2306985<br>(G>C) |
|---------------|--------------------------------------|----------------------------------------|------------------------------------------|---------------------------------|------------------------------------|----------------------------------|
| B ♀           | <b>IT</b> (TC)                       | <b>MM</b> (GG)                         | <b>EK</b> (CT)                           | TT                              | <b>TT</b> (CC)                     | <b>HH</b> (CC)                   |
| C ♀           | <b>TT</b> (CC)                       | <b>IM</b> (CG)                         | <b>EE</b> (CC)                           | TT                              | <b>TT</b> (CC)                     | <b>HH</b> (CC)                   |
| D ♂           | <b>TT</b> (CC)                       | <b>IM</b> (CG)                         | <b>EE</b> (CC)                           | TT                              | <b>TT</b> (CC)                     | <b>HH</b> (CC)                   |
| E ♂           | <b>IT</b> (TC)                       | <b>IM</b> (CG)                         | <b>EE</b> (CC)                           | TT                              | X                                  | <b>HH</b> (CC)                   |
| F ♂           | <b>TT</b> (CC)                       | <b>IM</b> (CG)                         | <b>EK</b> (CT)                           | TT                              | <b>TT</b> (CC)                     | <b>HH</b> (CC)                   |
| G ♂           | X                                    | X                                      | X                                        | X                               | X                                  | X                                |
| H ♂           | <b>TT</b> (CC)                       | <b>IM</b> (CG)                         | <b>EK</b> (CT)                           | TT                              | <b>TT</b> (CC)                     | X                                |
| I ♀           | <b>II</b> (TT)                       | <b>IM</b> (CG)                         | <b>EE</b> (CC)                           | TG                              | <b>TT</b> (CC)                     | <b>HH</b> (CC)                   |
| J ♀ -         | <b>TT</b> (CC)                       | <b>IM</b> (CG)                         | <b>EE</b> (CC)                           | TT                              | <b>TT</b> (CC)                     | <b>HH</b> (CC)                   |
| K ♀           | <b>IT</b> (TC)                       | <b>IM</b> (CG)                         | <b>EK</b> (CT)                           | TG                              | X                                  | <b>HH</b> (CC)                   |
| L ♀           | <b>TT</b> (CC)                       | <b>IM</b> (CG)                         | <b>EE</b> (CC)                           | TT                              | <b>TT</b> (CC)                     | <b>HH</b> (CC)                   |
| M ♂           | <b>II</b> (TT)                       | <b>II</b> (CC)                         | <b>EK</b> (CT)                           | TG                              | <b>IT</b> (TC)                     | <b>QH</b> (GC)                   |
| N ♂           | <b>IT</b> (TC)                       | <b>IM</b> (CG)                         | <b>EK</b> (CT)                           | TG                              | X                                  | <b>QH</b> (GC)                   |
| O ♂           | <b>IT</b> (TC)                       | <b>II</b> (CC)                         | <b>EK</b> (CT)                           | TT                              | <b>IT</b> (TC)                     | <b>QH</b> (GC)                   |
| Q ♂           | <b>IT</b> (TC)                       | <b>MM</b> (GG)                         | <b>EE</b> (CC)                           | TG                              | <b>IT</b> (TC)                     | <b>HH</b> (CC)                   |

Family pedigree showing relationship between family members is available on request from the corresponding author. The genotype allele is shown in parentheses; light grey indicates heterozygote; dark grey indicates homozygous for effect allele. Blue letters are amino acids encoded. For E98D rs2306986 (C): all tested were GG; For N166S rs3792683 (G): all tested were AA. X = not determined.

**Supplemental Table 3.** Characteristics of study participants included in meal response analysis.

| Family member studied |                                                                                        | Matched healthy volunteer   |                                                | Matched NAFLD patient |                                                                            |
|-----------------------|----------------------------------------------------------------------------------------|-----------------------------|------------------------------------------------|-----------------------|----------------------------------------------------------------------------|
| Person ID-Family      | Description                                                                            | Person ID-Healthy Volunteer | Description                                    | Person ID-NAFLD case  | Description                                                                |
| <b>F</b>              | ♂<br>BMI <25,<br><b>MTP564-TT</b><br>cirrhosis,<br>PNPLA3-IM<br>TM6SF2-EK              | <b>1</b>                    | ♂<br>BMI <30,<br>PNPLA3-IM<br>TM6SF2-EE        | <b>2</b>              | ♂<br>BMI ≥30,<br>NASH + fibrosis<br>PNPLA3-IM<br>TM6SF2-EK                 |
|                       |                                                                                        |                             |                                                | <b>3</b>              | ♂<br>BMI <30,<br>NASH + fibrosis<br>PNPLA3-IM<br><b>TM6SF2-KK</b>          |
| <b>J</b>              | ♀<br>BMI <25,<br><b>MTP564-TT</b><br>healthy<br>transplanted<br>PNPLA3-IM<br>TM6SF2-EE | <b>4</b>                    | ♀<br>BMI <30,<br><b>PNPLA3-MM</b><br>TM6SF2-EE | <b>5</b>              | ♀<br>BMI <30,<br>NASH<br>no fibrosis,<br>PNPLA3-II<br>TM6SF2-EE            |
| <b>K</b>              | ♀<br>BMI <25,<br>MTP564-IT<br>fatty liver<br>PNPLA3-IM<br>TM6SF2-EK                    | <b>6</b>                    | ♀<br>BMI <30,<br>PNPLA3-II<br>TM6SF2-EE        | <b>7</b>              | ♀<br>BMI ≥30,<br>NASH +<br>fibrosis,<br><b>PNPLA3-MM</b><br>TM6SF2-EE      |
| <b>M</b>              | ♂<br>BMI <30,<br>MTP564-II<br>healthy<br>PNPLA3-II<br>TM6SF2-EK                        | <b>8</b>                    | ♂<br>BMI <30,<br>PNPLA3 CC<br>TM6SF2 CT        | <b>9</b>              | ♂<br>BMI ≥30,<br>NASH +<br>fibrosis,<br>diabetic<br>PNPLA3-II<br>TM6SF2-EE |
| <b>Q</b>              | ♂<br>BMI <25,<br>MTP564-IT<br>healthy<br><b>PNPLA3-MM</b><br>TM6SF2-EE                 | <b>10</b>                   | ♂<br>BMI <30,<br>PNPLA3-II<br>TM6SF2-EE        | <b>11</b>             | ♂<br>BMI ≥30,<br>NASH + fibrosis<br><b>PNPLA3-MM</b><br>TM6SF2-EK          |

Participants were gender matched to family members and age matched within 9 years. Patients had NAFLD diagnosis on liver biopsy. Skin biopsy samples from participants J and 1 were used to derive cell lines used for analysis. *MTTP* mutation C encodes MTP-564T. *PNPLA3* C>G rs738408 and *TM6SF2* C>T rs58542926 genotype is shown. *PNPLA3* G is the effect allele encoding 148M; *TM6SF2* T is the effect allele encoding 167K. Bold indicates homozygous effect alleles.

**Supplemental Table 4.** All RNA-seq and CHIP-seq Sample Search Space (ARCHS4) tissue type and cell type predictions for hIPSC-derived hepatocyte-like cells.

| Index                  | MTP564-II wild type hIPSC derived hepatocyte-like cells |                               |                  |            |                | MTP564-TT variant hIPSC derived hepatocyte-like cells |                               |                  |            |                |         |
|------------------------|---------------------------------------------------------|-------------------------------|------------------|------------|----------------|-------------------------------------------------------|-------------------------------|------------------|------------|----------------|---------|
|                        | Name                                                    | P-value                       | Adjusted P-value | Odds ratio | Combined Score | Name                                                  | P-value                       | Adjusted P-value | Odds ratio | Combined Score |         |
| Tissue Type Prediction | 1                                                       | Liver (bulk tissue)           | 6.662e-163       | 7.194e-161 | 2.72           | 1017.19                                               | Liver (bulk tissue)           | 2.363e-171       | 2.552e-169 | 2.74           | 1075.07 |
|                        | 2                                                       | Hepatocyte                    | 3.025e-118       | 1.633e-116 | 2.44           | 661.17                                                | Hepatocyte                    | 4.413e-123       | 2.383e-121 | 2.45           | 689.05  |
|                        | 3                                                       | Small intestine (bulk tissue) | 1.268e-78        | 4.564e-77  | 2.15           | 385.83                                                | Small intestine (bulk tissue) | 4.644e-82        | 1.672e-80  | 2.16           | 403.60  |
|                        | 4                                                       | Gastric epithelial cell       | 9.568e-70        | 2.583e-68  | 2.08           | 330.09                                                | Ileum (bulk tissue)           | 4.053e-68        | 1.094e-66  | 2.04           | 316.85  |
|                        | 5                                                       | Ileum (bulk tissue)           | 4.833e-67        | 1.044e-65  | 2.05           | 313.59                                                | Lung (bulk tissue)            | 1.365e-61        | 2.948e-60  | 1.99           | 278.23  |
|                        | 6                                                       | Lung (bulk tissue)            | 5.792e-58        | 1.042e-56  | 1.97           | 259.88                                                | Gastric epithelial cell       | 1.754e-59        | 3.158e-58  | 1.97           | 266.04  |
|                        | 7                                                       | Colon (bulk tissue)           | 1.893e-53        | 2.921e-52  | 1.93           | 234.18                                                | Colon (bulk tissue)           | 2.340e-53        | 3.610e-52  | 1.91           | 231.44  |
|                        | 8                                                       | Gastric tissue (bulk)         | 4.762e-46        | 6.428e-45  | 1.85           | 193.58                                                | Gastric tissue (bulk)         | 3.668e-47        | 4.952e-46  | 1.85           | 197.74  |
|                        | 9                                                       | Omentum                       | 3.685e-39        | 4.422e-38  | 1.78           | 157.60                                                | Omentum                       | 6.260e-45        | 7.512e-44  | 1.83           | 185.93  |
|                        | 10                                                      | Amniotic fluid                | 1.454e-23        | 1.570e-22  | 1.59           | 83.40                                                 | Skin (bulk tissue)            | 5.090e-28        | 5.497e-27  | 1.63           | 102.71  |
| Cell Type Prediction   | 1                                                       | HEPG2                         | 9.067e-83        | 1.133e-80  | 2.16           | 407.91                                                | HEPG2                         | 1.419e-75        | 1.774e-73  | 2.08           | 358.54  |
|                        | 2                                                       | HUH7                          | 5.774e-52        | 3.609e-50  | 1.90           | 223.63                                                | HUH7                          | 5.473e-42        | 3.421e-49  | 1.87           | 216.27  |
|                        | 3                                                       | HEP3B                         | 1.702e-41        | 7.091e-40  | 1.79           | 168.03                                                | HEP3B                         | 9.101e-42        | 3.754e-40  | 1.78           | 167.99  |
|                        | 4                                                       | CFPAC1                        | 1.049e-38        | 3.278e-37  | 1.76           | 153.90                                                | CFPAC1                        | 2.518e-38        | 7.870e-37  | 1.74           | 150.72  |
|                        | 5                                                       | CAPAN1                        | 5.244e-36        | 1.311e-34  | 1.73           | 140.51                                                | MCF10                         | 2.035e-33        | 5.088e-32  | 1.69           | 126.93  |
|                        | 6                                                       | A549                          | 1.156e-29        | 2.409e-28  | 1.65           | 110.23                                                | CAPAN1                        | 3.661e-32        | 7.626e-31  | 1.67           | 121.00  |
|                        | 7                                                       | BXPC3                         | 7.111e-28        | 1.270e-26  | 1.63           | 102.00                                                | A549                          | 7.477e-32        | 1.335e-30  | 1.67           | 119.54  |
|                        | 8                                                       | MCF10                         | 2.724e-25        | 4.257e-24  | 1.60           | 90.38                                                 | BXPC3                         | 4.377e-27        | 6.840e-26  | 1.61           | 97.69   |
|                        | 9                                                       | RT4                           | 1.230e-23        | 1.709e-22  | 1.58           | 83.09                                                 | RT4                           | 1.444e-24        | 2.006e-23  | 1.58           | 86.55   |
|                        | 10                                                      | HT29                          | 2.676e-22        | 3.345e-21  | 1.56           | 77.31                                                 | HNSCC                         | 1.740e-23        | 2.175e-22  | 1.56           | 81.86   |

**Supplemental Table 5.** Gene set analysis showing terms for all genes differentially expressed between MTP564-II wild type and MTP564-TT variant hIPSC-derived hepatocyte-like cells.

| source | term_name                                       | term_id            | adjusted_p_value | negative_log10_of_adjusted_p_value |
|--------|-------------------------------------------------|--------------------|------------------|------------------------------------|
| REAC   | Extracellular matrix organization               | REAC:R-HSA-1474244 | 4.87E-07         | 6.312667258                        |
| GO:CC  | extracellular matrix                            | GO:0031012         | 2.85941E-06      | 5.543723748                        |
| REAC   | Degradation of the extracellular matrix         | REAC:R-HSA-1474228 | 2.43072E-05      | 4.614264431                        |
| GO:BP  | extracellular matrix organization               | GO:0030198         | 0.000831626      | 3.080071732                        |
| GO:BP  | extracellular structure organization            | GO:0043062         | 0.000894227      | 3.048552438                        |
| REAC   | Collagen formation                              | REAC:R-HSA-1474290 | 0.003136295      | 2.503583115                        |
| GO:BP  | digestion                                       | GO:0007586         | 0.004959299      | 2.304579689                        |
| GO:CC  | collagen-containing extracellular matrix        | GO:0062023         | 0.00516165       | 2.287211438                        |
| KEGG   | Protein digestion and absorption                | KEGG:04974         | 0.006978005      | 2.156268728                        |
| REAC   | Collagen biosynthesis and modifying enzymes     | REAC:R-HSA-1650814 | 0.014030082      | 1.852939779                        |
| KEGG   | ECM-receptor interaction                        | KEGG:04512         | 0.014057765      | 1.852083733                        |
| REAC   | ECM proteoglycans                               | REAC:R-HSA-3000178 | 0.016110075      | 1.792902441                        |
| TF     | Factor: slug; motif: NRCAGGTGCR; match class: 1 | TF:M12259_1        | 0.027606305      | 1.558991718                        |

**Supplemental Table 6.** Gene set analysis showing terms for genes upregulated in MTP564-II wild type hIPSC derived hepatocyte-like cells compared to MTP564-TT variant hIPSC-derived hepatocyte-like cells.

| source | term_name                                                                         | term_id            | adjusted_p_value | negative_log10_of_adjusted_p_value |
|--------|-----------------------------------------------------------------------------------|--------------------|------------------|------------------------------------|
| GO:CC  | midbody                                                                           | GO:0030496         | 0.014234541      | 1.846656538                        |
| REAC   | Resolution of Sister Chromatid Cohesion                                           | REAC:R-HSA-2500257 | 0.018667177      | 1.728921362                        |
| REAC   | Amplification of signal from unattached kinetochores via a MAD2 inhibitory signal | REAC:R-HSA-141444  | 0.023621746      | 1.626688011                        |
| REAC   | Amplification of signal from the kinetochores                                     | REAC:R-HSA-141424  | 0.023621746      | 1.626688011                        |
| GO:CC  | spindle                                                                           | GO:0005819         | 0.026656468      | 1.5741974                          |



**Supplemental Table 7.** Gene set analysis showing terms for genes upregulated in MTP564-TT variant hIPSC derived hepatocyte-like cells compared to MTP564-II wild type hIPSC-derived hepatocyte-like cells.

| source | term_name                                 | term_id            | adjusted_p_value | negative_log10_of_adjusted_p_value |
|--------|-------------------------------------------|--------------------|------------------|------------------------------------|
| REAC   | Extracellular matrix organization         | REAC:R-HSA-1474244 | 0.000145038      | 3.838517822                        |
| REAC   | Degradation of the extracellular matrix   | REAC:R-HSA-1474228 | 0.000353562      | 3.451534414                        |
| REAC   | ECM proteoglycans                         | REAC:R-HSA-3000178 | 0.002952027      | 2.529879617                        |
| GO:BP  | extracellular matrix organization         | GO:0030198         | 0.008885339      | 2.051326005                        |
| GO:BP  | extracellular structure organization      | GO:0043062         | 0.009318155      | 2.030670061                        |
| HP     | Abnormal cardiovascular system physiology | HP:0011025         | 0.014922899      | 1.826146793                        |
| KEGG   | ECM-receptor interaction                  | KEGG:04512         | 0.01921473       | 1.71636572                         |
| KEGG   | Focal adhesion                            | KEGG:04510         | 0.027077396      | 1.567393098                        |
| WP     | Focal Adhesion                            | WP:WP306           | 0.030961443      | 1.509178802                        |
| HP     | Osteoporosis                              | HP:0000939         | 0.038409054      | 1.415566389                        |
| HP     | Abnormality of skin physiology            | HP:0011122         | 0.043372457      | 1.362785975                        |
| HP     | Abnormality of humoral immunity           | HP:0005368         | 0.043717346      | 1.35934621                         |
| HP     | Abnormal vascular physiology              | HP:0030163         | 0.04508747       | 1.345944131                        |

# Supplemental Figures

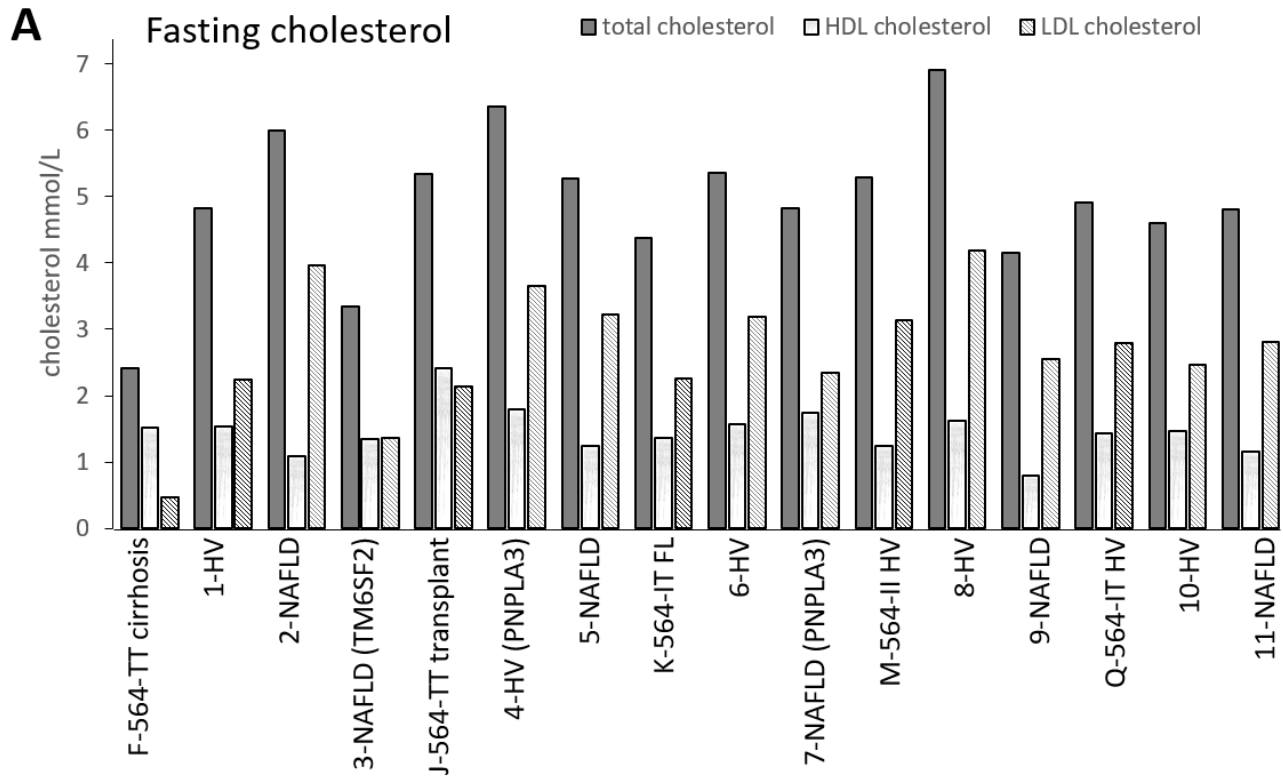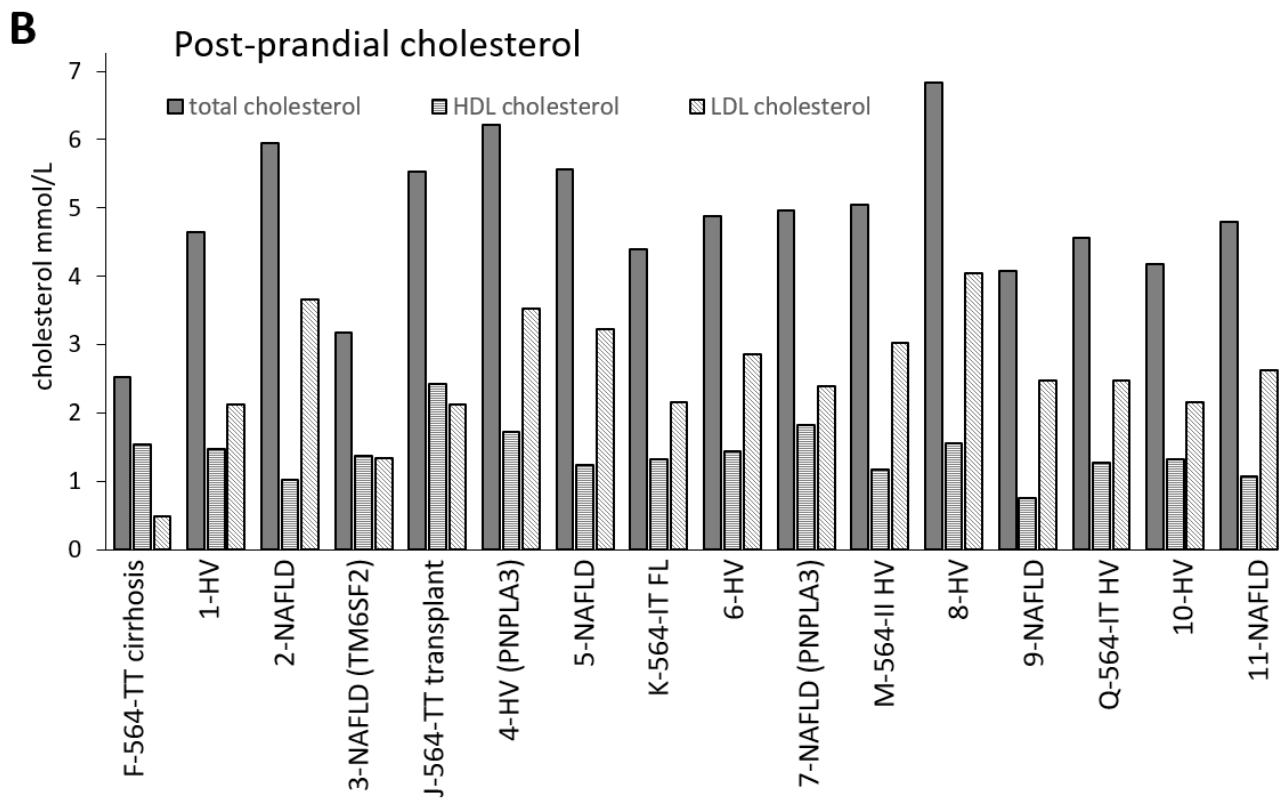

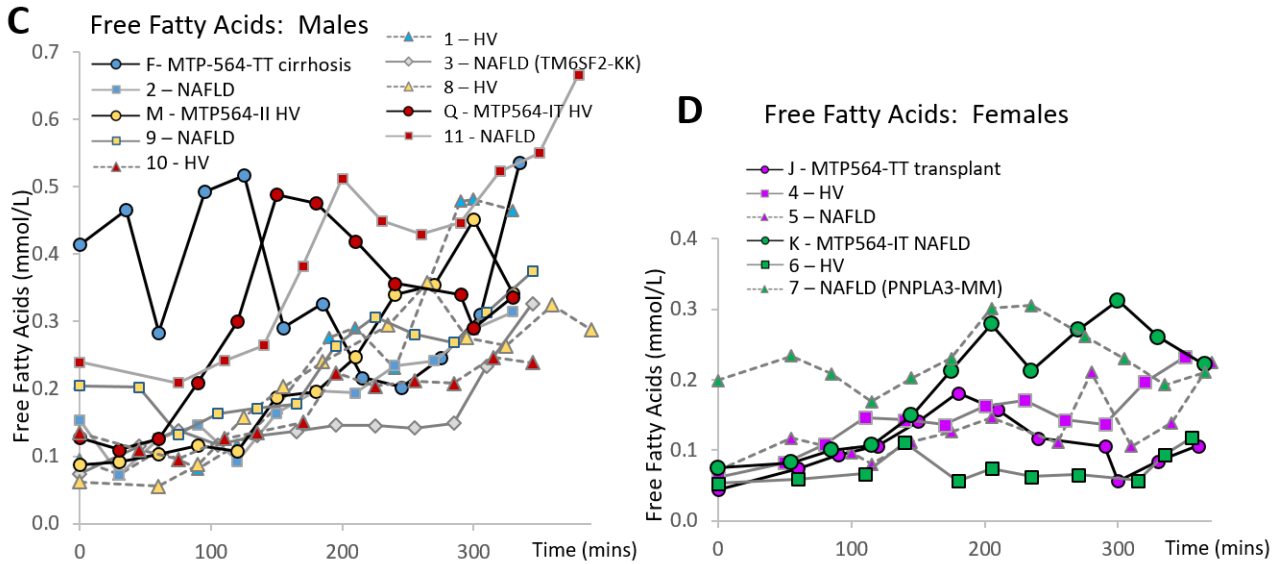

**Supplementary Figure 1. Serum cholesterol levels and free fatty acid levels in study participants.** Participants grouped according to age and gender matching with family member (Fig. 1a and Supplemental Table 3). Genes are shown in parentheses where participant is homozygous for other effect alleles: *PNPLA3* rs738409; *TM6SF2* rs58542926). **A** Fasting cholesterol. **B** Cholesterol level approx. 2h after eating standard study meal. **C** Free fatty acid levels in males. **D** Free fatty acid levels in females. NAFLD= non-alcoholic fatty liver disease; HV=healthy volunteer; FL=fatty liver. *PNPLA3* (rs738409) variant homozygotes (148-MM) and *TM6SF2* (rs58542926) variant homozygotes (128-KK) are indicated.

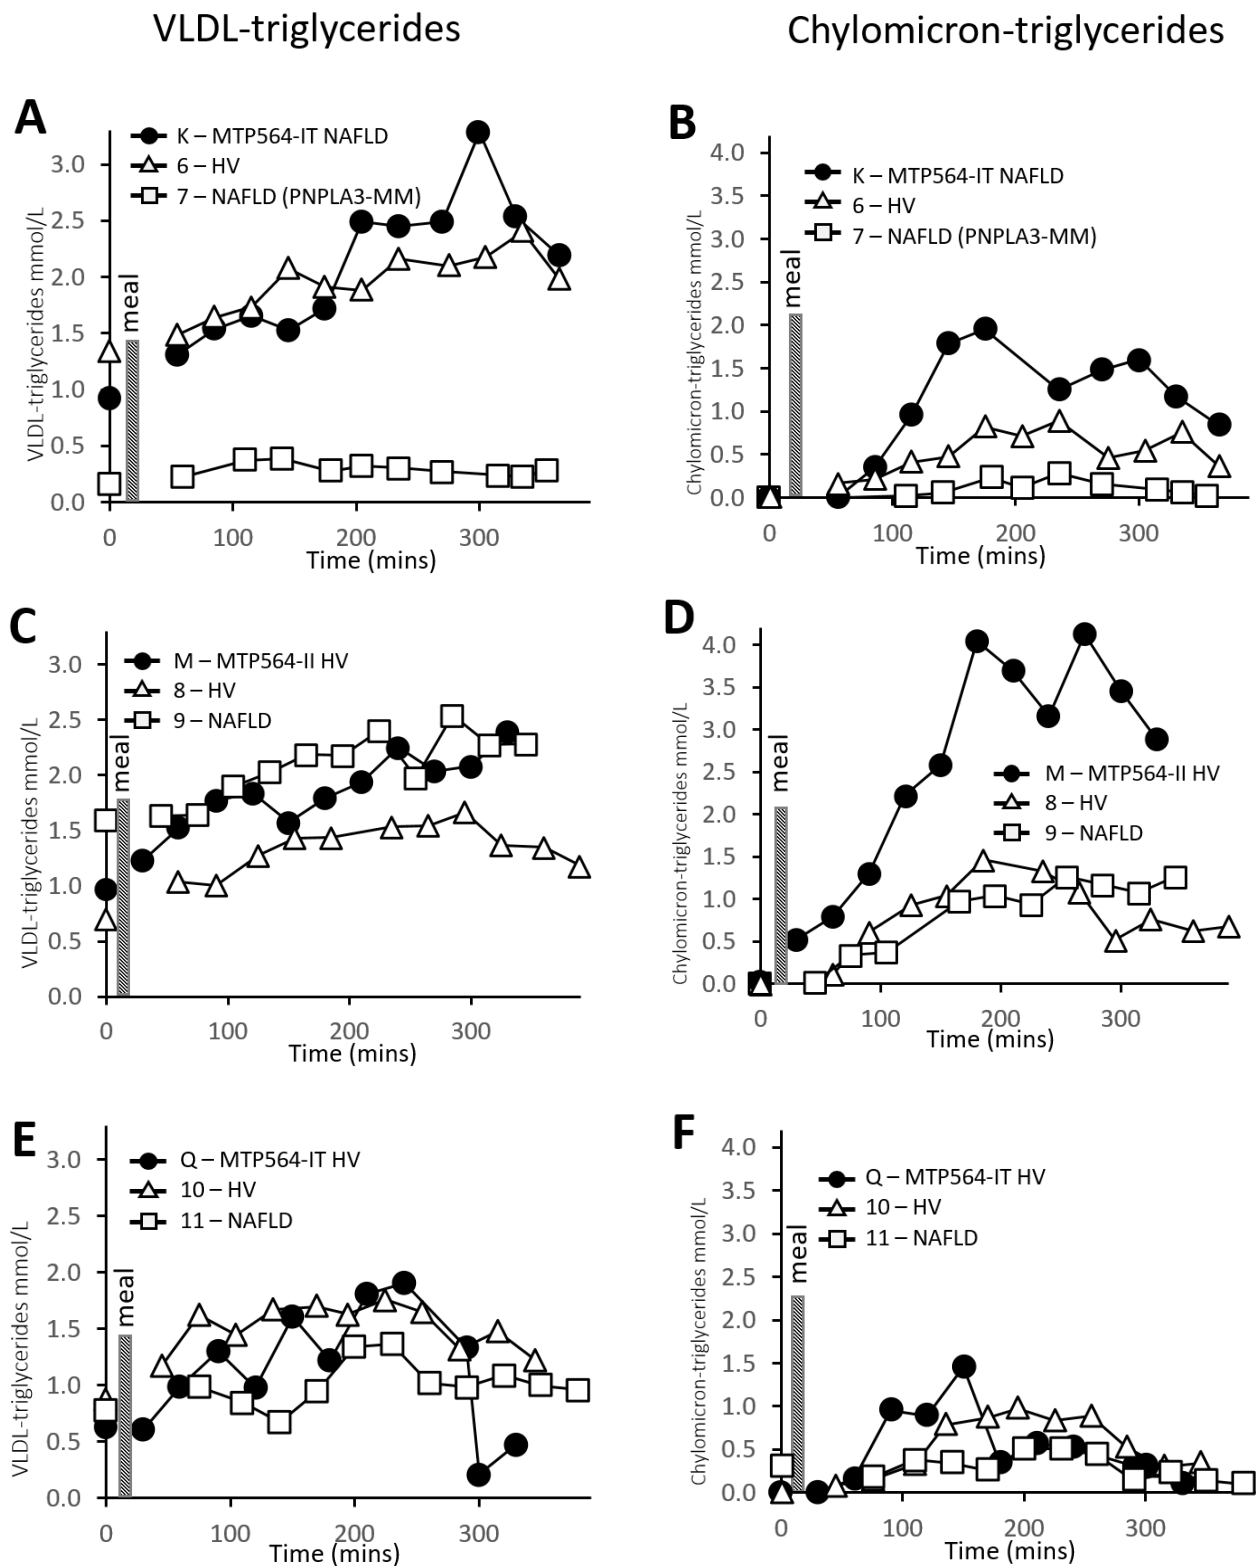

**Supplementary Figure 2. Lipoprotein-associated triglyceride levels in study participants before and after a fatty meal.** Participants are described in Supplemental Table 1. **A** Serum VLDL-triglycerides in MTP564-IT family member K and matched control participants: 6 (HV) and 7 (NAFLD patient). **B** Chylomicron-triglycerides in participants K, 6 and 7. **C** VLDL-triglyceride in MTP564-II (wild type) family member M and matched control participants: 8 (HV) and 9 (NAFLD patient). **D** Chylomicron-triglycerides in participants M, 8 and 9. **E** VLDL-triglycerides in MTP564-IT family member Q and matched control participants: 10 (HV) and 11 (NAFLD patient). **F** Chylomicron-triglycerides in participants Q, 10 and 11. *PNPLA3* (rs738409) variant homozygote (148-MM) is indicated. HV=healthy volunteer; NAFLD=non-alcoholic fatty liver disease.

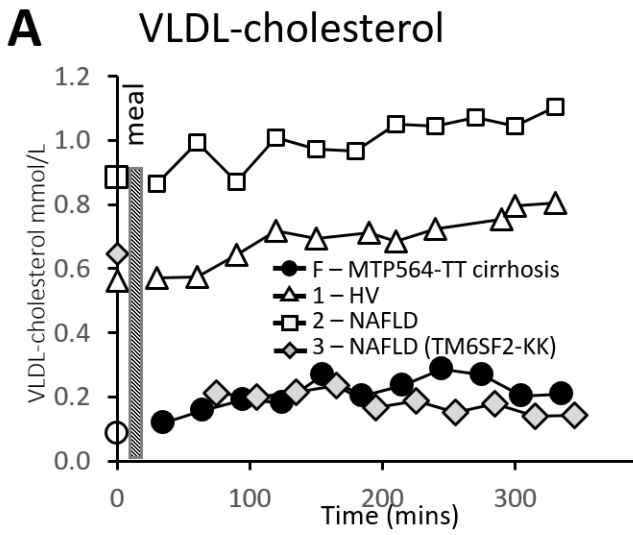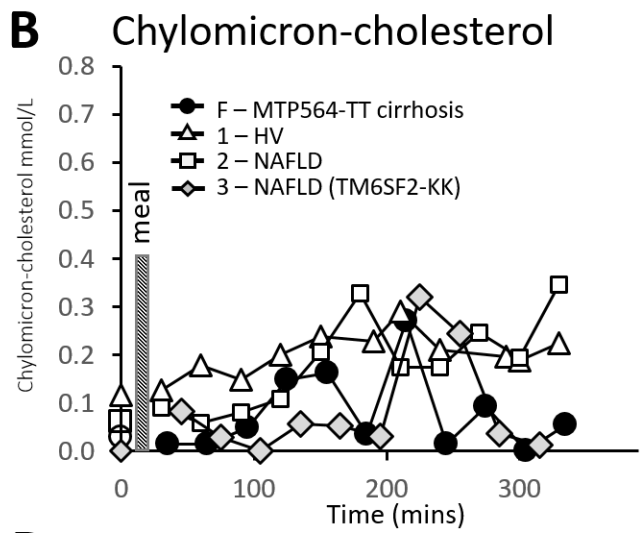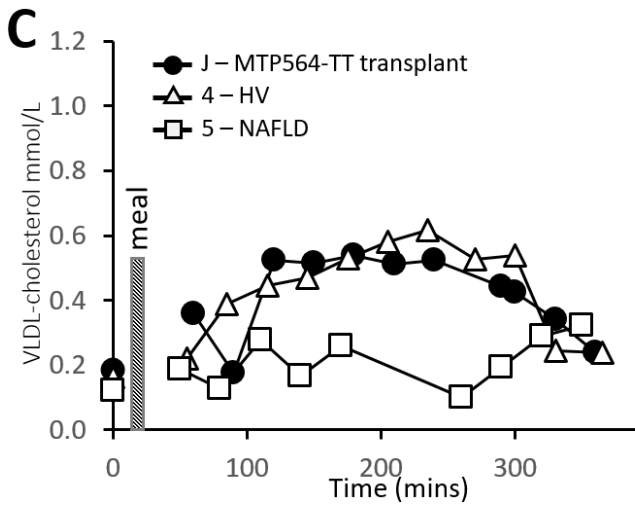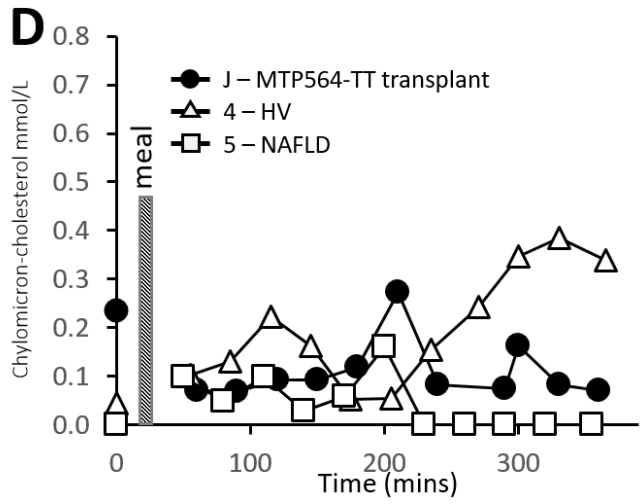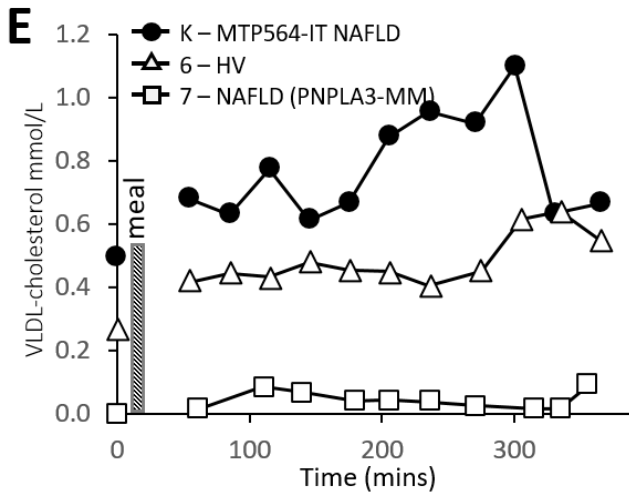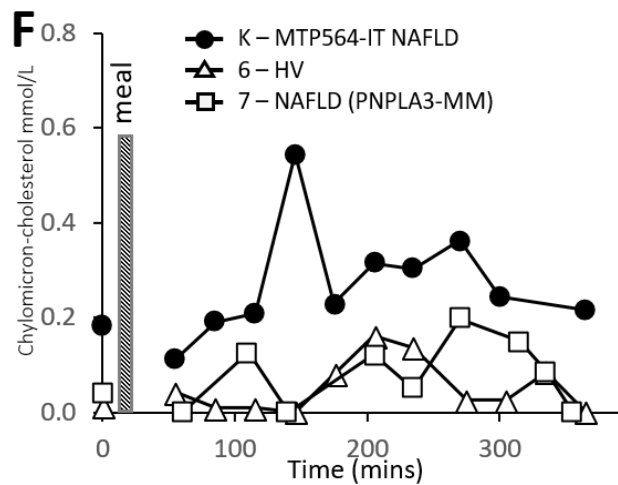

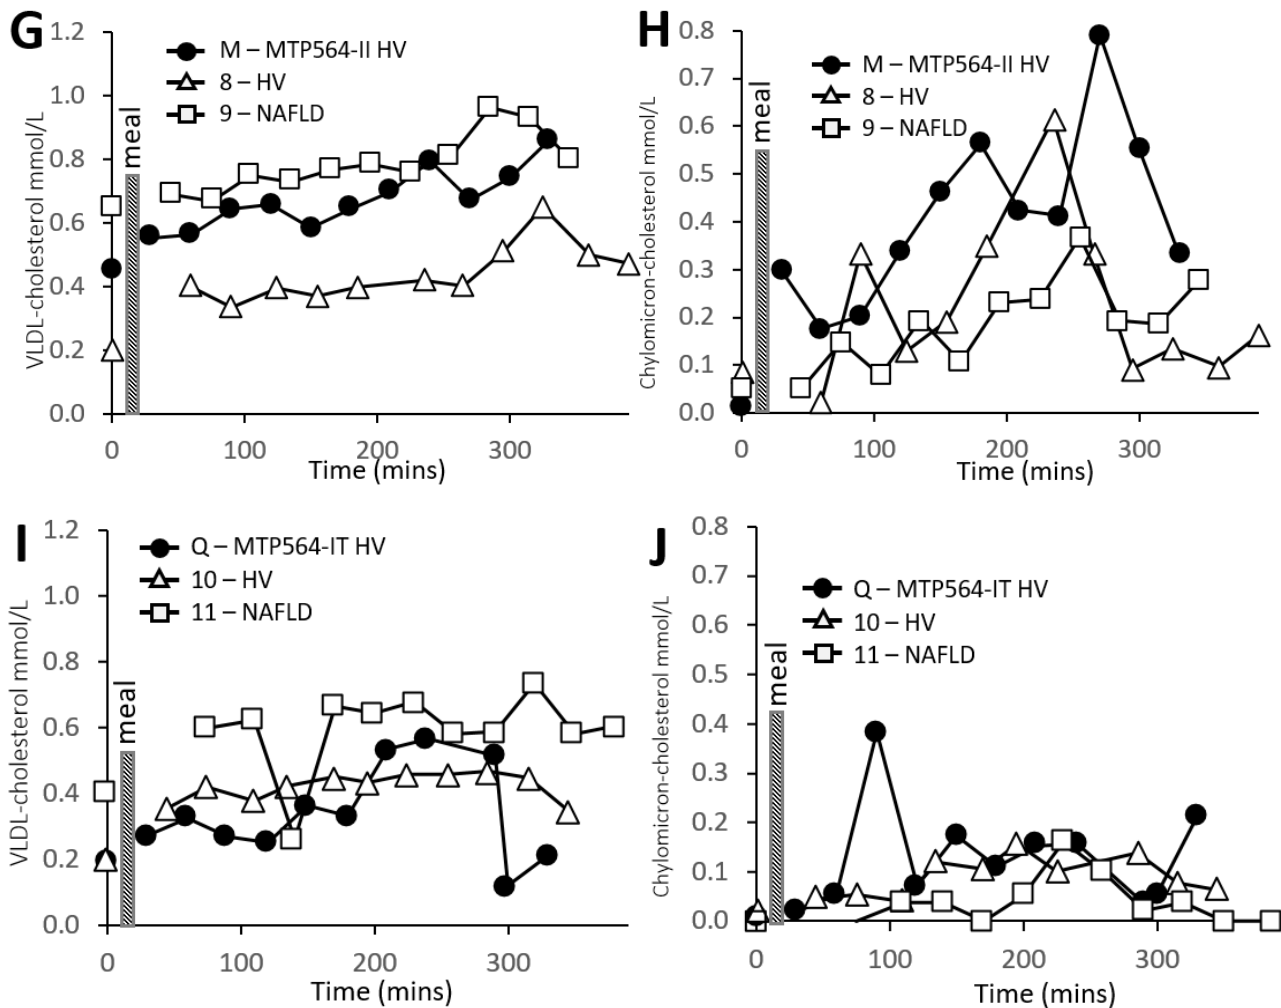

### Supplementary Figure 3. Lipoprotein-associated cholesterol levels in study

**participants before and after a high fat meal.** Participants are described in Supplemental Table 1. **A** VLDL-associated cholesterol levels in MTP564-TT family member F with cirrhosis and matched control participants: 1 (HV), 2 and 3 (NAFLD patients). **B** Chylomicron-associated cholesterol in participants F, 1, 2 and 3. **C** VLDL-cholesterol in MTP564-TT family member J with liver transplant and matched control participants: 4 (HV) and 5 (NAFLD patient). **D** Chylomicron-associated cholesterol in participants J, 4 and 5. **E** VLDL-associated cholesterol levels in MTP564-IT family member K with NAFLD and matched control participants: 6 (HV) and 7 (NAFLD patient). **F** Chylomicron-associated cholesterol in participants K, 6 and 7. **G** VLDL-associated cholesterol levels in MTP564-II (wild type) family member M and matched control participants 8 (HV) and 9 (NAFLD patient). **H** Chylomicron-associated cholesterol in participants M, 8 and 9. **I** VLDL-associated cholesterol levels in MTP564-IT family member Q and matched control participants 10 (HV) and 11 (NAFLD patient). **J** Chylomicron-associated cholesterol in participants Q, 10 and 11.

*TM6SF2* (rs58542926) variant homozygote (128-KK) and *PNPLA3* (rs738409) variant homozygotes (148-MM) are indicated. HV=healthy volunteer; NAFLD=non-alcoholic fatty liver disease.

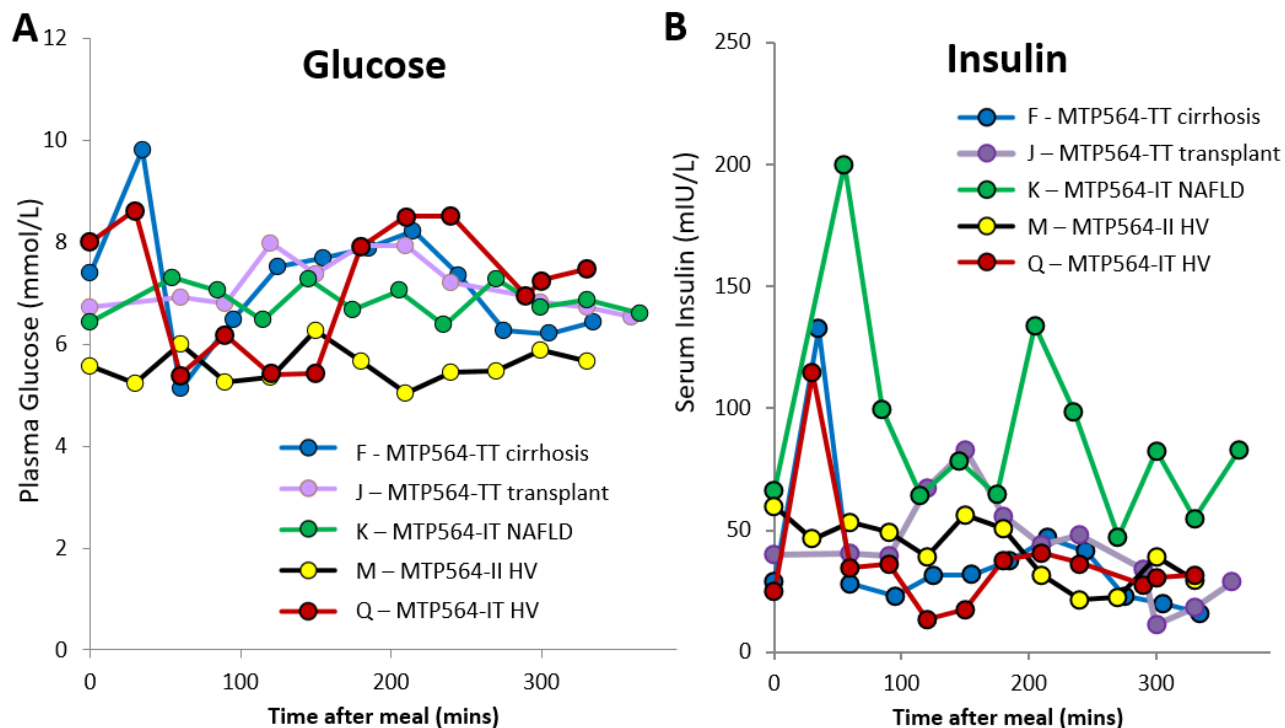

**Supplementary Figure 4 Blood biomarker levels in family members after consuming a fatty meal. A Fasting blood glucose. B Insulin levels.**

*PNPLA3* (rs738409) variant homozygotes (148-MM) and *TM6SF2* (rs58542926) variant homozygotes (128-KK) are indicated. HV=healthy volunteer; NAFLD=non-alcoholic fatty liver disease.

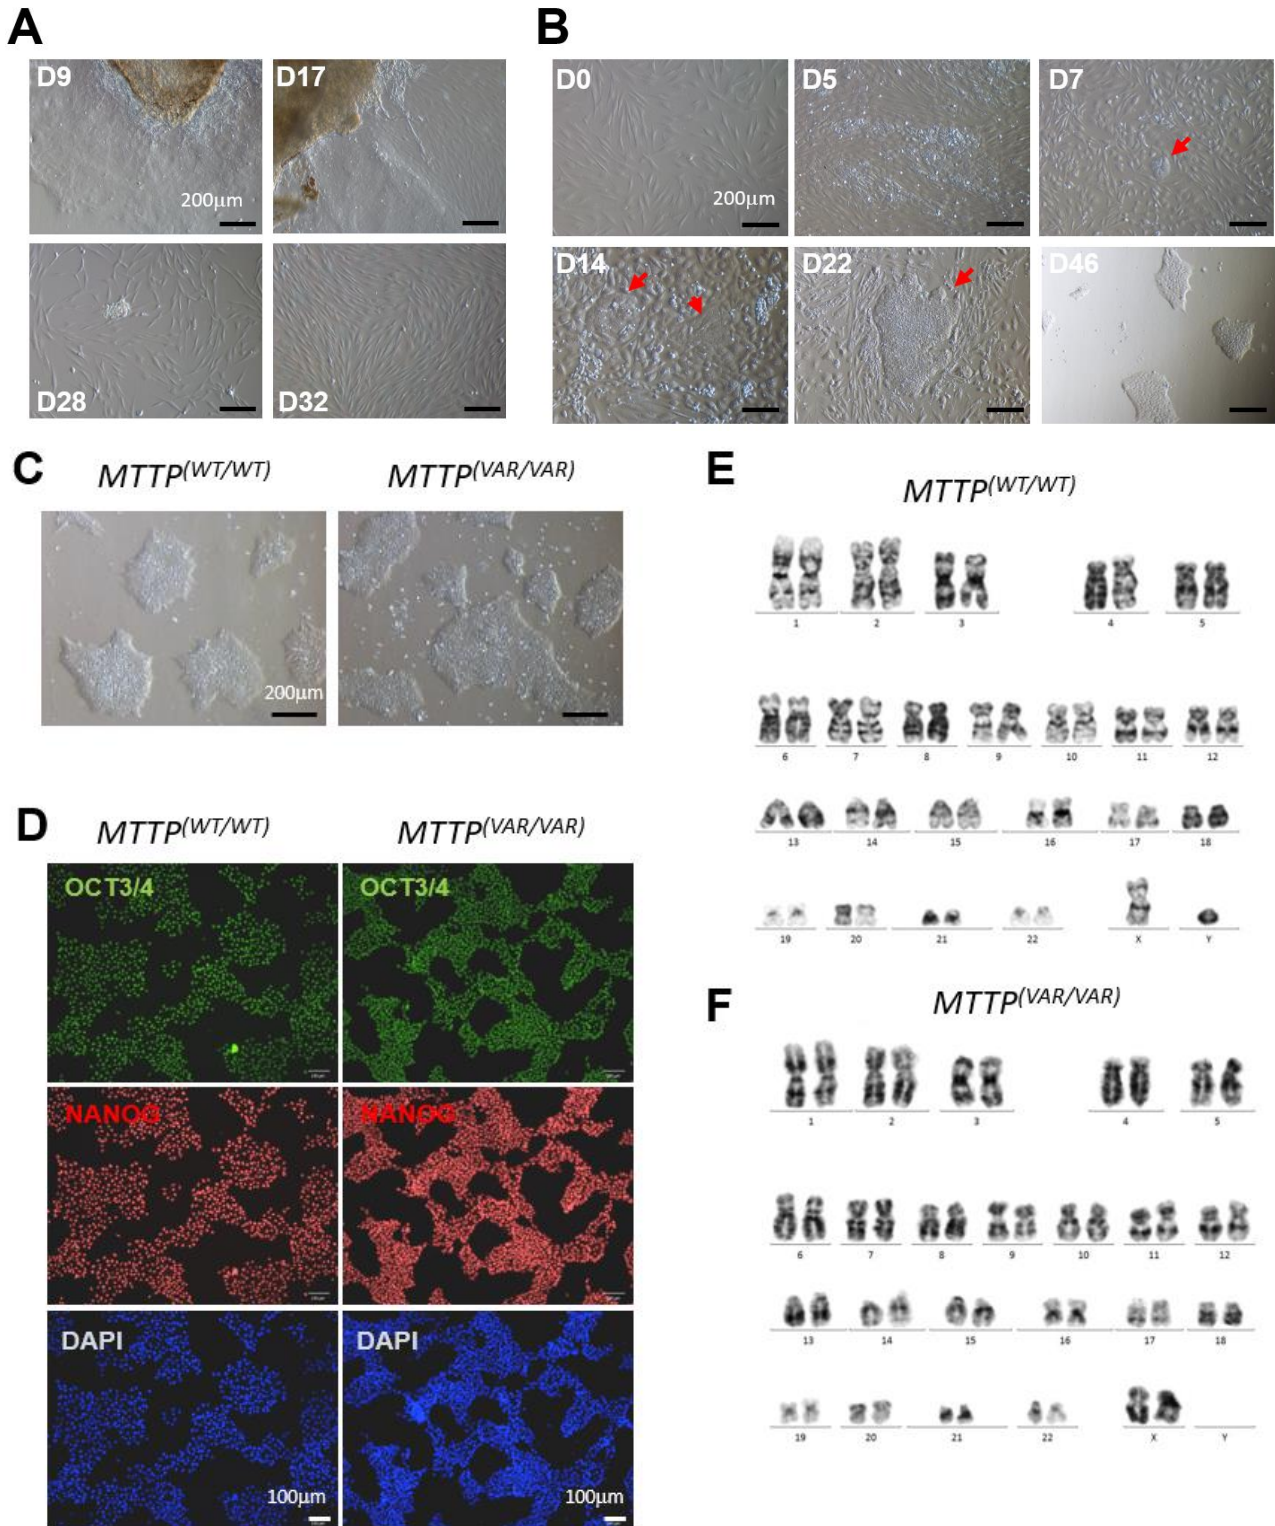

**Supplementary Figure 5. Characteristics of hiPSCs derived from donor skin biopsy. a,** Light microscopy showing representative skin biopsy fibroblast outgrowth at day 9, 17, 28 and 32. **b,** Light microscopy showing representative images of fibroblast reprogramming at day 0, 5, 7, 14, 22 and 46 post viral transduction. Red arrows indicate emerging hiPSC colonies. **c,** Light microscopy showing representative pictures of reprogrammed *MTTP*<sup>(WT/WT)</sup> and *MTTP*<sup>(VAR/VAR)</sup> hiPSC cultures. **d,** Immunocytochemistry showing expression of pluripotency markers in *MTTP*<sup>(WT/WT)</sup> and *MTTP*<sup>(VAR/VAR)</sup> hiPSCs. **e,** Karyotype of *MTTP*<sup>(WT/WT)</sup>. **f,** Karyotype of *MTTP*<sup>(VAR/VAR)</sup> hiPSCs.



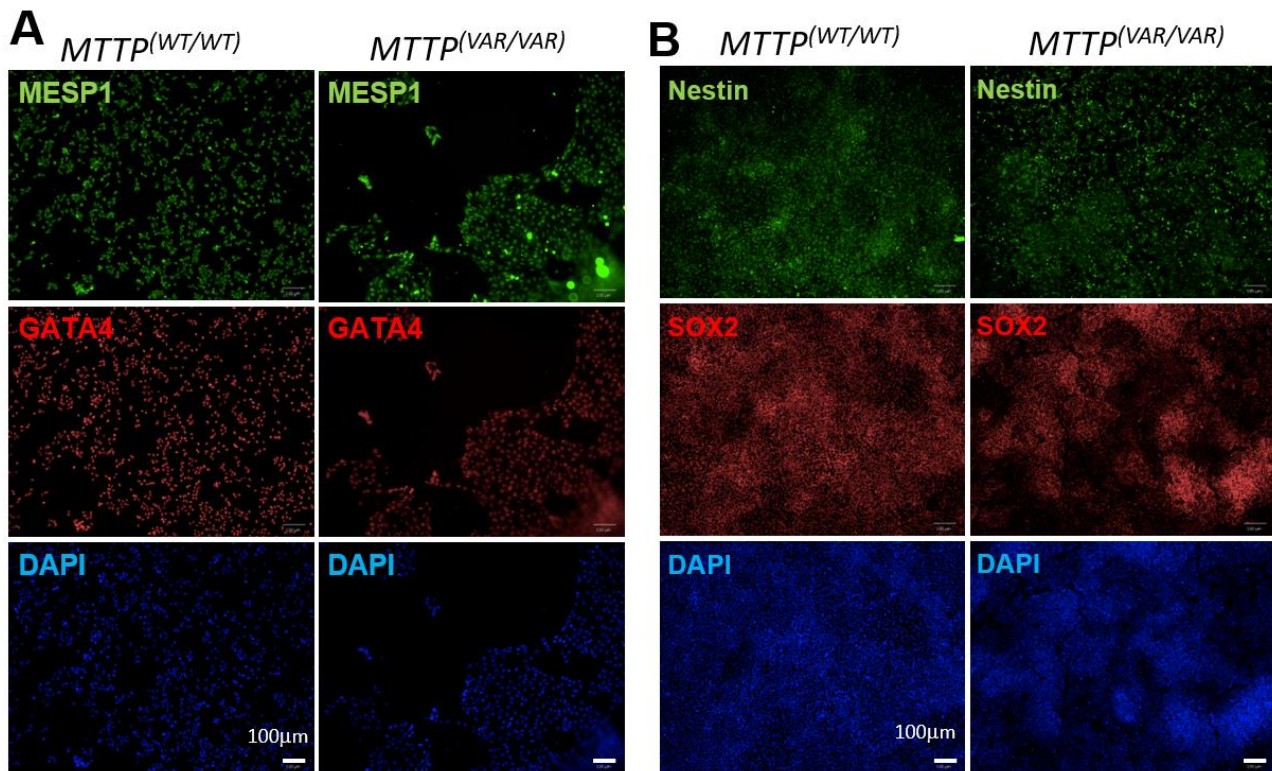

**Supplementary Figure 6. Differentiation of  $MTTP^{(WT/WT)}$  and  $MTTP^{(VAR/VAR)}$  hiPSCs into multiple germ layers.** **A** Expression of mesoderm genes following mesoderm differentiation of  $MTTP^{(WT/WT)}$  and  $MTTP^{(VAR/VAR)}$  hiPSCs by immunocytochemistry with MESP1, GATA4 and DAPI staining. **B** Expression of ectoderm genes following ectoderm differentiation of  $MTTP^{(WT/WT)}$  and  $MTTP^{(VAR/VAR)}$  hiPSCs by immunocytochemistry with Nestin, SOX2 and DAPI staining.

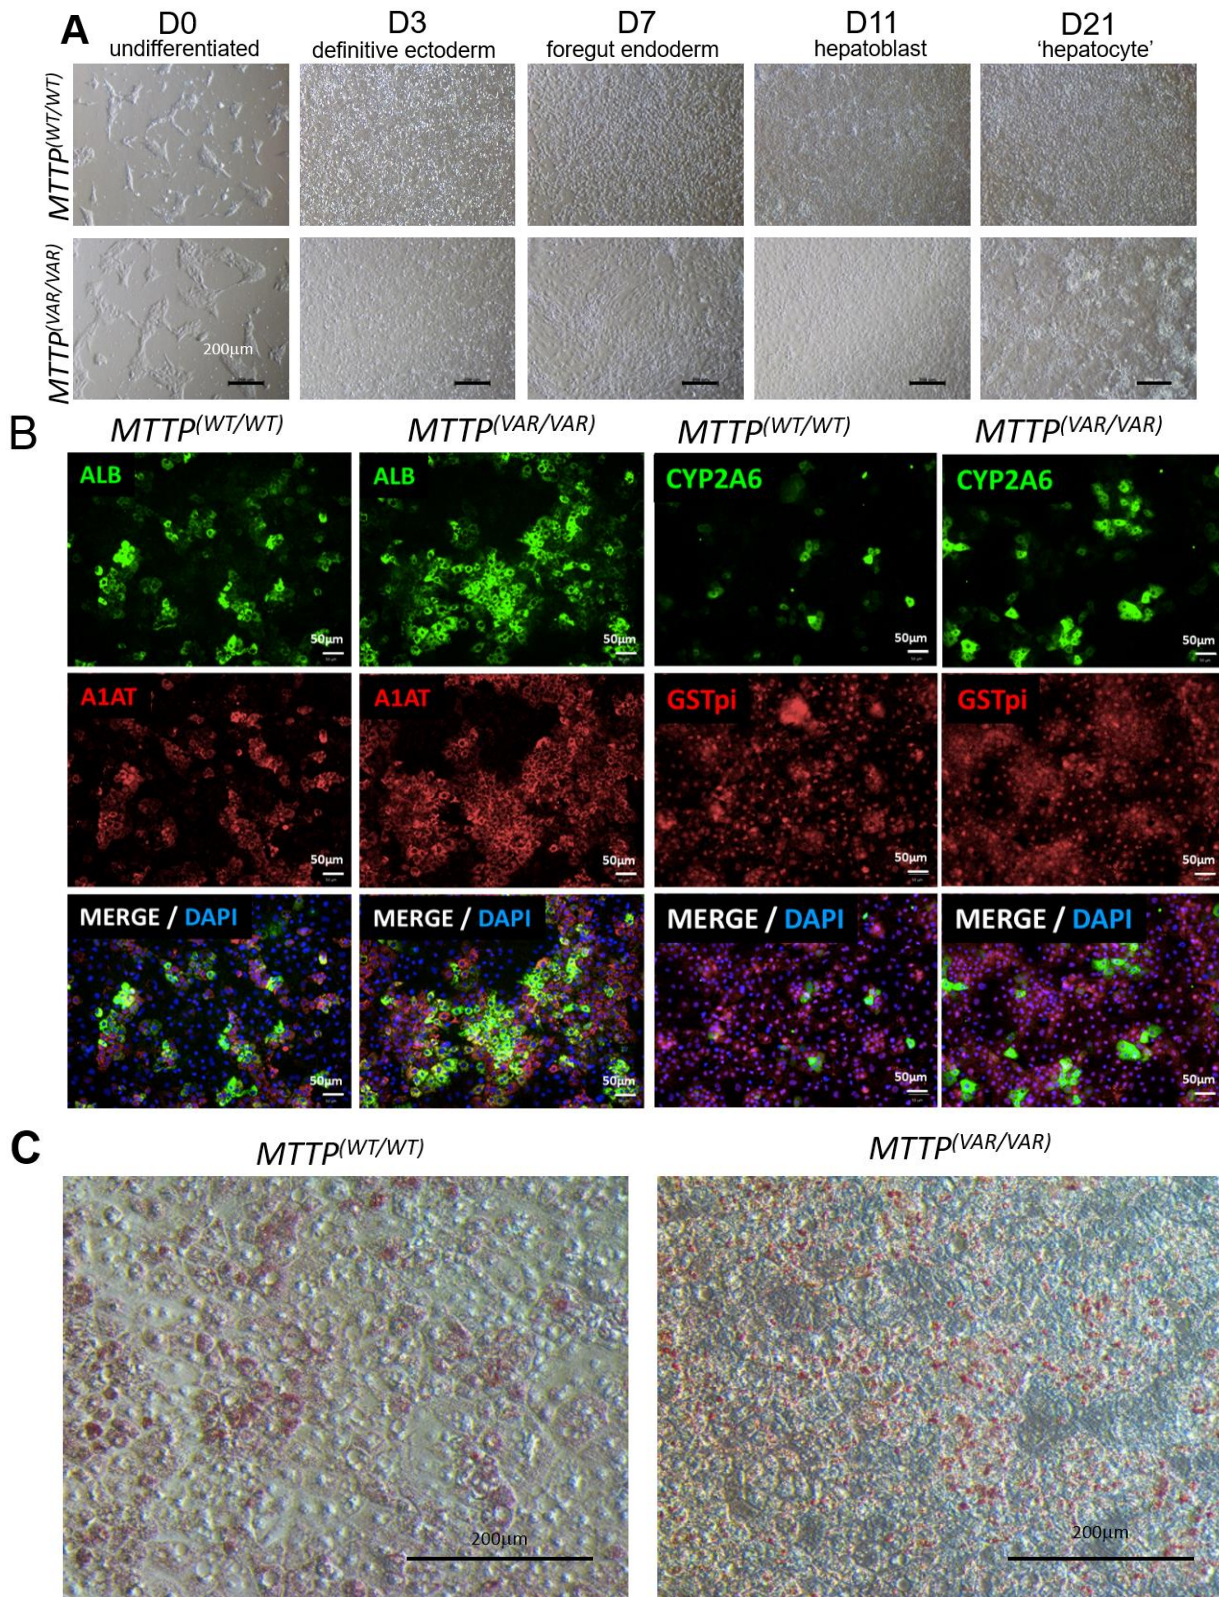

**Supplementary Figure 7. Differentiation of *MTTP*<sup>(WT/WT)</sup> and *MTTP*<sup>(VAR/VAR)</sup> hiPSCs into mature HLCs. **A** Representative light microscopy images of *MTTP*<sup>(WT/WT)</sup> and *MTTP*<sup>(VAR/VAR)</sup> hiPSCs as they differentiate into HLCs including undifferentiated cells (Day 0), definitive endoderm (Day 3), foregut endoderm (Day 7), hepatoblast (Day 11) and 'hepatocytes' (Day 21). **B** Immunocytochemistry showing expression of hepatocyte markers in *MTTP*<sup>(WT/WT)</sup> and *MTTP*<sup>(VAR/VAR)</sup> hiPSC derived HLCs. **C** Light microscopy of Oil-Red-O stained *MTTP*<sup>(WT/WT)</sup> and *MTTP*<sup>(VAR/VAR)</sup> HLCs.**
